1 **Detection of hypermucoviscous *Klebsiella pneumoniae* sequence type 86 capsular type**  
2 **K2 in South America as an unexpected cause of a fatal outbreak in captivity marmosets**

3

4 Juliana M. Guerra<sup>1</sup>, Natália. C.C. de A. Fernandes<sup>1,2</sup>, Alessandra Loureiro Morales dos  
5 Santos<sup>1,2</sup>, Joana de Souza Pereira Barrel<sup>1</sup>, Bruno Simões Sergio Petri<sup>3</sup>, Liliane Milanelo<sup>3</sup>,  
6 Monique Ribeiro Tiba-Casas<sup>1</sup>, Alcina Maria Liserre<sup>1</sup>, Cláudia Regina Gonçalves<sup>1</sup>, Cláudio  
7 Tavares Sacchi<sup>1</sup>, José Luiz Catão-Dias<sup>2</sup>, Carlos Henrique Camargo<sup>1</sup>.

8

9 1. Instituto Adolfo Lutz, São Paulo, Brazil

10 2. Universidade de São Paulo, São Paulo, Brazil

11 3. Parque Ecológico do Tietê, São Paulo, Brazil

12

13 **Correspondence**

14 Carlos Henrique Camargo

15 Instituto Adolfo Lutz - Centro de Bacteriologia - Núcleo de Doenças Entéricas e Infecções  
16 por Patógenos Especiais

17 Avenida Dr. Arnaldo, 351 - 9º Andar

18 Pacaembú - São Paulo, SP – Brasil

19 Phone: +55-11-3068-2896 Fax: +55-11-3068-2898

20 **Email:** [carlos.camargo@ial.sp.gov.br](mailto:carlos.camargo@ial.sp.gov.br)

21

22 **First author biographical sketch**

23

24 Dr. Guerra is a veterinary pathologist and scientific researcher in the Center of Pathology of  
25 Adolfo Lutz Institute. Her research focuses on the comparative pathology of emerging and  
26 reemerging infectious diseases in the context of an integrated One Health approach.

27

28

29 **Running title**

30

31 hvKp ST86 K2 outbreak in marmosets in Brazil

32

33 **Abstract**

34           After the sudden death of eleven captives marmosets in a rehabilitation center of  
35 wildlife in São Paulo, Brazil, histological and microbiological study was conducted. Liver,  
36 spleen, intestine, central nervous system, lung, thymus, stomach, testicle tissues were  
37 analyzed by light microscopy and microbial cultures were conducted. Environmental cultures  
38 were also performed. Prophylactic antimicrobial therapy, restricted access to marmosets'  
39 cages with dedicated staff, and additional sanitization of animals' fruits were implemented.  
40 Histological findings were compatible with hyperacute septicemia, and microbiological  
41 cultures and molecular tests identified the etiologic agent as hypermucoviscous sequence type  
42 86 capsular type K2 *K. pneumoniae* for the first time in South America. Implementation of  
43 prompt containment measures led to successful control of this outbreak. Detection of a  
44 hypervirulent and zoonotic pathogen, such as hypermucoviscous *K. pneumoniae* ST86 K2, in  
45 an unexpected and human interface reservoir underscores its potential threat in public health  
46 settings.

47

48 **Key-words:** Disease Outbreaks, Primate Diseases, One Health, *Klebsiella pneumoniae*

49

50

51        **1. INTRODUCTION**

52

53            *Klebsiella pneumoniae* is a Gram-negative, encapsulated, non-motile, rod-shaped and  
54 opportunistic bacteria present as a normal part of the nasopharynx and gastrointestinal tract  
55 microbiome of humans and animals (1–3). Since the mid-1980s and 1990s, a new  
56 hypervirulent (hypermucoviscous) variant of *K. pneumoniae* (hvKp), initially described in  
57 Southeastern Asia (4–6), has arisen as an important emerging pathogen, affecting young and  
58 healthy individuals from Europe, North, Central and South America, Australia, Africa and the  
59 Middle East (7–13).

60            This variant presents clinical signs and bacterial genotypic and phenotypic features  
61 that allow the differentiation from opportunistic *K. pneumoniae*. hvKp has been frequently  
62 associated with serious clinical complications, including multisystemic pyogenic abscess in  
63 liver, lungs and brain, meningitis, endophthalmitis, osteomyelitis, septicemia and pulmonary  
64 embolism (12–15). Also, hvKp strains usually have a distinguish hypermucoviscosity  
65 phenotype when grown on agar plates, based on a positive string test. The development of  
66 prominent polysaccharide capsules, associated with capsular serotypes K1 or K2, have been  
67 reported as the major virulence determinants for human hvKp in liver abscesses (16–19),  
68 since it seems to protect the bacteria from phagocytosis and preventing destruction by  
69 bactericidal serum factors. In addition, a number of putative virulence genes, such as the  
70 gene *rmpA*, a regulator of the mucoid phenotype gene, located on a plasmid, mucoviscosity-  
71 associated gene *magA*, which encodes a structural outer membrane protein of the K1  
72 serotype, and aerobactin genes have been described (17,20,21).

73            *K. pneumoniae* strains have also been associated with a variety of diseases in animals,  
74 especially in New and Old World primates (22–24). Sudden death or variable clinical signs,  
75 including anorexia, prostration, fever, cough, dyspnea, mucopurulent discharge, meningitis,

76 pneumonia, peritonitis, and sepsis are strongly associated with sporadic infections of  
77 *Klebsiella pneumoniae* in experimental colonies of common marmosets (24,25). A mixed  
78 infection of *Klebsiella* species and *Bordetella bronchiseptica* have also been reported to  
79 cause purulent otitis media in this same species, with frequent extension to the brain, leading  
80 to abscessing encephalitis and meningitis (26). Multiple antibiotic-resistant *Klebsiella* strains  
81 have been isolated from meningitis in *Macaca mulatta* (rhesus macaques) (22). Richard  
82 (1989) described a subcutaneous abscess due to *K. pneumoniae* K5 in a breed of squirrel  
83 monkey (*Saimiri* spp.) at the Pasteur Institute of Cayenne, French Guyana, and a fatal  
84 infection due to *K. pneumoniae* K2 in a colony of lemurs, at Mulhouse zoological garden  
85 (East of France) (27). Positive *K. pneumoniae* bacterial culture related to necrotic and  
86 hemorrhagic enteritis and typhlocolitis were observed in an experimental colony of owl  
87 monkeys (*Aotus nancymai*) (2). More recently, hvKp has been identified in *Cercopithecus*  
88 *aethiops* (Africa green monkeys) causing liver abscesses with bacteremia, meningitis,  
89 endophthalmitis (28–30) and suppurative in a captive gold-handed tamarin (*Saguinus midas*  
90 *midas*) (31). Bilateral mucopurulent nasal discharge, fever, anemia, and swelling of the  
91 inguinal lymph nodes was described in a *Allouatta Clamitans* due to hvKp ST23 serotype K1  
92 (32). However, some species, as cynomolgus and rhesus macaques can act as carriers and  
93 maintain subclinical infection with *K. pneumoniae* (30).

94         Despite the well-recognized zoonotic importance of hvKp and the public health risk  
95 of emerging multidrug-resistant strains (33–35), there is a lack of information regarding the  
96 complete genotyping and phenotyping characterization of the etiologic agent, which is  
97 essential to establish adequate diagnosis and treatment of this pathogen in captive and wild  
98 non-human primates. Thus, the aim of this study was to report an epizootic of common  
99 marmosets in a rehabilitation center of wildlife in Brazil and characterize the serotype,  
100 sequence typing, virulence properties and resistance profile of *K. pneumoniae* strains.

101

## 102 **2. MATERIALS AND METHODS**

103

### 104 **2.1. Study population**

105

106 All the animals described in this study were maintained in Parque Ecológico do Tietê  
107 (23°29'46"S, 46°31'10"O), a center for reception, rehabilitation and referring of wildlife  
108 animals, located at São Paulo municipality, São Paulo, Brazil. All callitrichids (*Callithrix*  
109 *jacchus*, *C. penicillata* and hybrids) were housed in a shed of five stainless steel 2 m<sup>3</sup> cages  
110 and 15 stainless steel 0.4 m<sup>3</sup> cages, dedicated only to this species, with a maximum number of  
111 eight animals per cage with anti-mosquito screen, feeding platforms, logs and ropes. This  
112 center comprises an average daily census of approximately 70 wild-caught callitrichids, that  
113 were brought to the facility due to hunting or traffic. These animals have been maintained in  
114 captivity for an average period of 140 days for rehabilitation. The cages were cleaned daily  
115 by an exclusive employee, except on weekends, when the same worker also cleans the  
116 reptilian cages. Standard husbandry procedures included two-times daily feeding program  
117 with a commercial food (Megazoo, Minas Gerais, Brazil), diet supplements consisting of a  
118 variety of vegetables, fruits, sporadically, *Tenebrio* spp. and crickets, and water *ad libitum*.  
119 Routine quarantine procedures consist of physical examination and vermifugation. The  
120 animals were also periodically monitored by a veterinarian.

121

### 122 **2.2. Animals and sampling**

123

124 On 10th and 11 February 2019, eleven captive marmosets (eight *C. penicillata*, two *C.*  
125 *jacchus* and one hybrid), without previous clinical signs, suddenly died. They lived in the

126 same shed and into five different cages with others 72 animals and none of them presented  
127 any symptoms. All animals were in captivity from 123 to 399 days. No new animals had been  
128 introduced into the cages in the last 25 days.

129 The necropsy was performed on the same day and macroscopic examination showed  
130 no major findings. Tissues samples were preserved in phosphate-buffer formalin 10% and in  
131 refrigeration for 12 hours. Since 1999, according to the Non-Human Primates Epizootic  
132 Events Surveillance System of Brazilian Ministry of Health (36), which was incorporated  
133 into the Yellow Fever Surveillance System. All epizootic event in this population should be  
134 investigated in reference laboratories. As so, these samples were sent to Adolfo Lutz Institute  
135 for analysis. This study was approved by the Ethics Committee for the Use of Animals  
136 (CEUA) of Adolfo Lutz Institute, Brazil (protocol n°11/2016), SISBIO registration no. 50551  
137 for the manipulation of wildlife material and SISGEN registration no. A1A2A72 and  
138 A7EB4B6.

139

### 140 **2.3 Histological and histochemical examination**

141

142 For light microscopy small pieces of liver, spleen, intestine, central nervous system,  
143 lung, thymus, stomach, and testicle tissue were fixed in neutral 10% phosphate-buffered  
144 saline formaldehyde. Fixed tissue specimens were dehydrated by graded ethanol treatment  
145 and were routinely embedded in paraffin wax for light microscopy. Embedded sections (3  
146 µm) were stained with haematoxylin and eosin (H&E). Also, additional slides were submitted  
147 to histological gram staining. The presence of lesions, intensity, distribution and presence of  
148 inflammatory infiltrate were analyzed.

149

### 150 **2.4 Isolation and characterization of *Klebsiella* spp.**

151 Liver, brain and pooled tissues were aseptically cultured on sheep blood agar (Oxoid,  
152 Basingstoke, UK) and MacConkey agar (Oxoid, Basingstoke, UK) and incubated overnight at  
153 37°C. The plates were examined the day after inoculation for the presence of any growth.  
154 Pink-yellow, mucoid, lactose-positive colonies were cultured, and identified as *Klebsiella*  
155 *pneumoniae* Complex based on motility, lysine decarboxylation, citrate utilization and indole  
156 non-production. The string test was used to check the hypermucoviscosity of *K. pneumoniae*  
157 colonies. The result was defined as positive when an inoculation loop was able to generate a  
158 viscous string of 5 mm in length from a colony on a blood agar plate after overnight  
159 incubation (8) while a negative sting test was assigned when the string was less than 5 mm in  
160 length or no string was present.

161

## 162 **2.5 Environmental testing**

163

164 In order to identify the source of *K. pneumoniae* strains, environmental samples of  
165 water from the lake near to the primate cages and drag swabs from their cages were screened  
166 for the presence of *K. pneumoniae*. Water samples (100mL) were filtered with 0.22 µm  
167 sterile membranes (Jet Biofil, China) and placed onto the surface of a MacConkey Agar plate.  
168 Typical colonies (mucoid, lactose-fermenting) were identified by biochemical tests (see  
169 above). Drag swabs were streaked onto MacConkey Agar plates and typical *K. pneumoniae*  
170 colonies were subjected to the same tests as employed for the water isolates.

171

## 172 **2.6 Antimicrobial susceptibility testing**

173

174 A representative isolate (P04) was subjected to antimicrobial susceptibility testing by  
175 using the broth microdilution methodology with Sensititre (Thermo, Waltham, USA) plate,



176 according to the manufacturer's instructions. Minimal inhibitory concentration values were  
177 categorized as susceptible, intermediate or resistance following Clinical and Laboratory  
178 Standards Institute (CLSI, Wayne, USA) M100-S29 breakpoints (available at  
179 <http://em100.edaptivedocs.net/dashboard.aspx>).

180

## 181 **2.7 Pulsed-field gel electrophoresis (PFGE)**

182

183 All isolates identified as *K. pneumoniae* were submitted to DNA macro-restriction by  
184 using 30U of XbaI enzyme followed by Pulsed-field gel electrophoresis in a CHEF-III  
185 apparatus, according to the PulseNet International guidelines  
186 (<https://www.cdc.gov/pulsenet/pathogens/pfge.html>). The Universal Size Standard Strain  
187 H9812 (*Salmonella* Braenderup) (37) was used as reference in all gels. Gel images were  
188 analyzed in the BioNumerics v.7.6.2 (Applied Maths, Sint-Martens-Latem, Belgium) with the  
189 generation of dendrogram based on unweighted pair group method with arithmetic mean  
190 (UPGMA) methods and similarities calculated by Dice coefficient with tolerance and  
191 optimization both set at 1.5%.

192

## 193 **2.8 DNA extraction and whole genome sequencing**

194

195 The representative strain P04 was selected based on the PFGE results, and subjected  
196 to whole genome sequencing. High quality whole genome was extracted from a pure culture  
197 of 16h growth in Luria-Bertani broth (Oxoid, Basingstoke, UK) by using the Wizard  
198 Genomic DNA Purification Kit (Promega, Madison, USA) according to the instructions of  
199 the manufacturer. DNA was tagged by using the Ion Xpress™ Plus Fragment Library Kit  
200 and the libraries constructed were sequenced in an Ion Torrent S5 platform. Reads were de

201 novo assembled with the Spades algorithm (v.5.12.0.0) and submitted to online platforms.  
202 Definitive species identification was carried out by Ribosomal Multilocus Sequence Typing  
203 (rMLST) (<https://pubmlst.org/rmlst/>). Antimicrobial resistance genes were sought at the  
204 Resfinder tool of the Center for Genomic Epidemiology website  
205 (<http://www.genomicepidemiology.org/>). Sequence Type, virulence genes and capsular type  
206 data were extracted from the Institute Pasteur MLST and whole genome MLST databases  
207 (<http://bigsdbs.pasteur.fr/>). Based on the reference genome CG43 (isolate 1530 on Institute  
208 Pasteur database available at [https://bigsdbs.pasteur.fr/cgi-](https://bigsdbs.pasteur.fr/cgi-bin/bigsdbs/bigsdbs.pl?db=pubmlst_klebsiella_isolates&page=plugin&name=Contigs&format=text&isolate_id=1530&match=1&pc_untagged=0&min_length=&header=1)  
209 [bin/bigsdbs/bigsdbs.pl?db=pubmlst\\_klebsiella\\_isolates&page=plugin&name=Contigs&format](https://bigsdbs.pasteur.fr/cgi-bin/bigsdbs/bigsdbs.pl?db=pubmlst_klebsiella_isolates&page=plugin&name=Contigs&format=text&isolate_id=1530&match=1&pc_untagged=0&min_length=&header=1)  
210 [=text&isolate\\_id=1530&match=1&pc\\_untagged=0&min\\_length=&header=1](https://bigsdbs.pasteur.fr/cgi-bin/bigsdbs/bigsdbs.pl?db=pubmlst_klebsiella_isolates&page=plugin&name=Contigs&format=text&isolate_id=1530&match=1&pc_untagged=0&min_length=&header=1)), high quality  
211 single-nucleotide polymorphisms (SNPs) were extracted from the P04 genome and from the  
212 available ST86 *K. pneumoniae* genomes from the Institute Pasteur MLST and whole genome  
213 MLST databases. A phylogenetic tree based on the concatenated alignments was built on the  
214 CSI Phylogeny 1.4 (<https://cge.cbs.dtu.dk/services/CSIPhylogeny/>). The genome of the hv  
215 ST374 *K. pneumoniae* was included as outgroup. The Newick generated file was uploaded on  
216 the Microreact platform along with metadata of such isolates (project V8uV0aPEU) for the  
217 generation of a tree with the SNPs and metadata. The whole-genome shotgun project reported  
218 here has been deposited at DDBJ/EMBL/GenBank under the accession number  
219 SPSP000000000.

220

## 221 **RESULTS**

222

### 223 **2.1 Histological and histochemical examination**

224

225 Multiple sections of different tissues were microscopically examined and similarly affected.  
226 The major microscopic finding consistent to sepsis it was intravascular presence of bacilli in  
227 liver (10/10), cerebrum (8/10), lung (3/10), heart (1/7), intestine (1/7), thymus (1/2), and  
228 skeletal muscle (1/1). Others relevant microscopic findings of different tissues are  
229 summarized on the Table 1.  
230 Furthermore, intestine it was the unique organ that it was observed bacteria into the lumen of  
231 lymphatic vessels (1/7). Other nonspecific findings consists to tubular proteinosis (4/8) and  
232 tubular acute necrosis (1/8) in kidney, hepatic steatosis (1/10), lymph histiocytic admixed or  
233 not with neutrophils enteritis (2/7), Peyer plaques hyperplasia (1/7), cardiac congestion (1/7),  
234 focus of edema of the cardiomyocytes and necrotizing and lymphohistiocytic myocarditis  
235 (1/7). Stomach, tongue, testis, thymus, skin, uterus, lymph-node didn't show microscopic  
236 alterations on all the fragments analyzed. Some tissues couldn't be analyzed due to the  
237 several autolysis.

238

## 239 **2.2 Isolation and characterization of *Klebsiella* spp.**

240

241 Microbial cultures performed from brain and liver from eight different animals recovered *K.*  
242 *pneumoniae* in all of them, as pure growth, and with hypermucoviscous phenotype, i.e.,  
243 positive string test. The isolate P04 presented susceptibility to all the antimicrobial agents  
244 evaluated (Table 2).

245

## 246 **2.3 Environmental testing**

247

248 *K. pneumoniae* isolates were recovered from both water and drag swab samples.

249

## 250 2.4 Pulsed-field gel electrophoresis (PFGE)

251

252 Molecular typing of *K. pneumoniae* revealed the same XbaI-PFGE profile among the isolates  
253 recovered from the dead animals (Figure 2, cluster A, pulsotypes A1 and A2), however,  
254 environmental isolates clustered apart from the invasive isolates (Figure 2, clusters B and C).

255

## 256 2.5 Whole genome sequencing

257

258 Whole genome sequencing resulted in 1,049,163 reads and the *de novo* assembled genome  
259 comprised 5,358,608 bps grouped in 62 contigs, with an average coverage depth of 53.  
260 rMLST and kmer tools confirmed the presence of *K. pneumoniae* as the species of isolate  
261 P04. Acquired antimicrobial resistant genes were not detected, but the constitutive *bla*SHV-1,  
262 *oqx*AB and *fos*A were. *In silico* multilocus sequence typing analysis identified the isolate as  
263 the sequence type ST86, with the following combination alleles: *gap*A, 9; *inf*B, 4; *mdh*, 2; *pgi*,  
264 1; *pho*E, 1; *rpo*B, 1; *ton*B, 27. The capsular type K2 was identified. According to the  
265 virulence database of BIGSdb *K. pneumoniae*, P04 presented the *mrk*ABCDFHIJ cluster  
266 (mannose-resistant *Klebsiella*-like type III fimbriae cluster, associated with adhesiveness and  
267 fimbrial filament formation to adherence to eukaryotic cells) (38) in the same contig of the  
268 *kvg*AS genes. The *iro*BCD genes (salmochelin) were also detected, in the same contig that the  
269 *rmp*A gene (regulator of mucoid phenotype A). The *rmp*A2 gene was detected within the  
270 contig along the *iuc*ABD with the *iut*A genes (aerobactin).

271 Phylogenetic analysis of high quality SNPs showed that ST86 isolates were closely related,

272 and the P04 strain clustered close to IPEUC340, an isolate recovered in 1975 in France

273 (Figure 3.A). The isolate RJF293, ST374, clustered apart from the ST86 isolates (Figure 3.B).

274

275 **DISCUSSION**

276

277 In this study, eleven marmosets suddenly died after habitual management of the  
278 captives in one of the largest centers for reception, rehabilitation and referring of wildlife  
279 animals in the municipality of São Paulo, the largest city in South America. Histological  
280 findings were compatible with a hyperacute septicemia, microbiological cultures and  
281 molecular tests identified the etiologic agent as hypermucoviscous, ST86, K2 *K. pneumoniae*.  
282 This bacteria represents one of the priority organisms to be controlled according to the World  
283 Health Organization, particularly the carbapenem- and polymyxin-resistant strains (39). The  
284 emergence of these strains is a concern in human and veterinary medicine due to the  
285 potential of these strains to acquire multidrug resistance genes, their capacity to persist in the  
286 environment and to infect a wide-range of hosts and the unavailability of vaccines against  
287 these strains for humans and animals (40).

288 The role of *K. pneumoniae* in wildlife has been revisited, especially in callitrichidae  
289 species, which are highly susceptible to fatal infections caused by this bacteria in captivity  
290 (24,40). The bacteria likely spreads by close contact and aerosol between animals and  
291 through fomites between cages (41). Frequently described in association with  
292 immunosuppressive conditions in New world monkeys, *Klebsiella* is considered an  
293 opportunist agent, leading to pneumonia, peritonitis, cystitis, meningitis, and septicemia (2).  
294 The propensity of common marmosets to bacterial infection could be related to the low  
295 variability in the MHC class II loci that may compromise anti-bacterial immune response and  
296 also explain the high frequency of septicemia and endotoxemia after deep wounds and  
297 fighters in this genus (41,42).

298 We identified that the strains recovered from marmosets that suddenly died were  
299 clonally related by PFGE analysis. Since PFGE is known by its high discriminatory power,

300 we can suppose that a common source was present. In order to investigate the source of such  
301 strain, environmental samples (water and drag swabs) were cultured, and despite the growth  
302 of *K. pneumoniae*, molecular typing revealed that environmental strains were not related to  
303 the clinical isolates. Despite our efforts, we were not able to detect the source of the  
304 hypermucoviscous *K. pneumoniae* in this outbreak during our investigation. Other studies  
305 also faced this same limitation (2) and suggested that dietary supplements could be the most  
306 likely source responsible for the introduction of *K. pneumoniae* in the colonies. Vegetables  
307 and fruits, especially bananas and their peels, seems to carry a widely diverse  
308 Enterobacteriales microbial community (23). Even we have not found the source of the  
309 virulent *K. pneumoniae* isolate causing this outbreak, drag swabs of the living animals were  
310 negative for such strain, indicating that the remaining population of marmosets was not  
311 carriers of this hvKp isolate. In fact, no other animals died after this event. We can admit that  
312 the end of this outbreak can be attributed to implementation of effective measures to contain  
313 the dissemination of the virulent *K. pneumoniae* strain. The use of Bactrim as prophylaxis  
314 during the first 5 days after the identification of deaths may be one of the successful measures  
315 implemented, since the isolate was susceptible to this drug. In fact, the isolate did not present  
316 any resistance marker to the evaluated antimicrobial agents (Table 2). In addition, accession  
317 to the cages was restricted to a dedicated employee, who wore dedicated clothes during the  
318 permanence in the marmosets' shed. Additional sanitization step of fruits with 2% sodium  
319 hypochlorite for 15 minutes and dedicated space and staff for preparation of marmosets'  
320 meals were also implemented after the epizootic event.

321 Whole genome sequencing of one representative isolate identified several virulence  
322 genes that can be associated with its hypermucoviscous phenotype. Among the several  
323 virulence genes detected, the ones associated with invasiveness and with capsule production  
324 could contribute to the evasiveness of immune system resulting in the severe and fulminant

325 clinical conditions observed. Indeed, four out of the five suggested virulence genes  
326 recognized to be associated with the hv phenotype were detected in the P04 genome, namely  
327 *rmpA*, *rmpA2* (regulators of mucoid phenotype A), *iuc* (aerobactin), and *iroB* (salmochelin)  
328 (43).

329 The hypermucoviscous *K. pneumoniae* P04 strain was identified as sequence type  
330 ST86 and capsular typing K2. Previous reports also identified this hypervirulent clone with a  
331 wild-type susceptibility profile causing severe infections in both hospital (44) and  
332 community-acquired infections in humans (45), highlighting the role of hypermucoviscous *K.*  
333 *pneumoniae* as etiological of human infections. Intriguingly, infections due hvKp ST86 K2  
334 are apparently more severe than the infections due to other hvKp clones (46). As of October  
335 2019, 26 isolates belonging to ST86 were available in the PasteurMLST database  
336 (<https://bigsd.bpasteur.fr/>). All of them isolated from humans, and predominantly from  
337 Europe (12/26) and Asia (10/26) (10,47–49). Only two isolates were previously identified in  
338 America, one recovered from the blood of a patient with liver abscess in Buffalo, USA, in  
339 2013 (50) and another one recovered from the cerebrospinal fluid of a patient with meningitis  
340 in Pointe-a-Pitre, Guadeloupe, in 2014 (51). Therefore, to the best of our knowledge, this is  
341 the first description of hvKp ST86 K2 *K. pneumoniae* from South America.

342 Our phylogenetic analysis demonstrated that ST86 genomes are very closely related,  
343 but the origin of the P04 isolate could not be certainly inferred, since it clustered with the  
344 RFJ293 isolate, recovered in 1975 from France. The expansion of the emerging pathogen  
345 hypermucoviscous *K. pneumoniae* ST86 K2 among different reservoirs should be carefully  
346 surveilled, since relates of hypervirulent and multi-drug resistant strains are raising (52).

347 In summary, we report the detection of hypermucoviscous *K. pneumoniae* ST86 K2  
348 for the first time in South America, responsible for a sudden and fatal outbreak in captive  
349 marmosets. Implementation of prompt containment measures led to successful control of this

350 outbreak. The burden of hypermucoviscous *K. pneumoniae* ST86 K2 in unexpected  
351 reservoirs, including the ones in human interface, deserves further investigation.

352

353

#### 354 **ACKNOWLEDGEMENTS**

355

356 We thank the team of curators of the Institut Pasteur MLST and whole genome MLST  
357 databases for curating the data and making them publicly available at <http://bigsd.b.pasteur.fr/>  
358 and all contributors of Center of Pathology for routine sample processing.

359

#### 360 **CONFLICT OF INTEREST**

361

362 The authors declare that they have no conflict of interest.



363 **Tables headings**

364

365 Table 1. Histologic findings described about the fragments submitted for microscopic

366 evaluation.

367

368 Table 2. Antimicrobial susceptibility profile determined by Sensititre (Thermo Scientific) of

369 the epizootic strain hypermucoviscous *K. pneumoniae* ST86 strain P04.

370

371 **Figure subtitles**

372

373 **Figure 1.** Microscopic findings of histological and histochemical examination prepared for

374 light microscopy. A – Spleen. Necro hemorrhagic splenitis in multiple germ centers (H&E

375 4x). B – Brain (Meningis). Bacterial rods inside vascular lumen (arrows) (H&E 40x). C –

376 Lung. Several interstitial pneumonia (H&E 4x) and alveolar hemorrhage (inset – H&E10x).

377 D – Intestine. Lymphoplasmacytic enteritis (arrowheads) and intravascular bacterias (arrow)

378 (H&E 20x and 40x). E – Liver. Necrosis (arrowheads) associated with the presence of

379 numerous bacterial rods (arrow). Hepatocytes also show steatosis and the sinusoids are filled

380 by neutrophils (H&E 40x). The inset image shows discrete mononuclear portal hepatitis and

381 presence of numerous bacterial rods (H&E 20x). F – Liver. The sinusoids are filled by gram-

382 negative bacterial structures (heads) and neutrophils (Gram 40x).

383 **Figure 2.** Dendrogram and PFGE typing of XbaI restricted *K. pneumoniae* strains isolated

384 from infection (blue, cluster A), drag swab (green, cluster B) and water (red, cluster C).PFGE

385 profiles (represented by capital letters) were defined based on 100% Dice similarity cutoff

386 value of the UPGMA clustering method (1.5% optimization; 1.5% tolerance). NA: not  
387 applicable.

388

389 **Figure 3.** Schematic representations of high quality SNPs trees built from publicly available  
390 ST86 *K. pneumoniae* genomes. In (A) it is possible to note that the P04 isolate described in  
391 this study clustered close to the IPEUC-340 isolate, recovered in 1975 in France. In (B) we  
392 observe the high similarity of ST86 *K. pneumoniae* genomes in comparison with the outgroup  
393 strain RJF293, an ST374 hypermucoviscous *K. pneumoniae* recovered from invasive  
394 infection. Green circles represent the ST86 isolates, and the red one represents the ST374.

395 **REFERENCES**

396

- 397 1. Davis GS, Price LB. Recent Research Examining Links Among *Klebsiella*  
398 *pneumoniae* from Food, Food Animals, and Human Extraintestinal Infections. *Curr*  
399 *Environ Heal Reports*. 2016 Jun;3(2):128–35.
- 400 2. Gozalo AS, Elkins WR, Lambert LE, Stock F, Thomas ML, Woodward RA. Genetic  
401 diversity of *Klebsiella pneumoniae* isolates during an outbreak in a non-human primate  
402 research colony. *J Med Primatol*. 2016 Dec;45(6):312–7.
- 403 3. Simmons J GS. Bacterial and mycotic diseases of nonhuman primates. In: Bennett BT,  
404 Abee CR HR, editor. *Nonhuman Primates in Biomedical Research*. San Diego:  
405 Academic Press; 2012. p. 105–72.
- 406 4. Liu YC, Cheng DL, Lin CL. *Klebsiella pneumoniae* liver abscess associated with  
407 septic endophthalmitis. *Arch Intern Med*. 1986 Oct;146(10):1913–6.
- 408 5. cheng D-L. Septic Metastatic Lesions of Pyogenic Liver Abscess. *Arch Intern Med*.  
409 1991 Aug;151(8):1557.
- 410 6. Wang J, Liu Y, Lee SS, Yen M, Wang, Yao-Shen Chen J, Wann S, et al. Primary  
411 Liver Abscess Due to *Klebsiella pneumoniae* in Taiwan. *Clin Infect Dis*. 1998  
412 Jun;26(6):1434–8.
- 413 7. Fang FC, Sandler N, Libby SJ. Liver Abscess Caused by magA+ *Klebsiella*  
414 *pneumoniae* in North America. *J Clin Microbiol*. 2005 Feb;43(2):991–2.
- 415 8. Siu LK, Yeh K-M, Lin J-C, Fung C-P, Chang F-Y. *Klebsiella pneumoniae* liver  
416 abscess: a new invasive syndrome. *Lancet Infect Dis*. 2012 Nov;12(11):881–7.
- 417 9. Shon AS, Bajwa RPS, Russo TA. Hypervirulent (hypermucoviscous) *Klebsiella*  
418 *pneumoniae*. *Virulence*. 2013 Feb;4(2):107–18.
- 419 10. Bialek-Davenet S, Criscuolo A, Ailloud F, Passet V, Jones L, Delannoy-Vieillard A-S,

- 420 et al. Genomic Definition of Hypervirulent and Multidrug-Resistant *Klebsiella*  
421 *pneumoniae* Clonal Groups. *Emerg Infect Dis*. 2014 Nov;20(11):1812–20.
- 422 11. Yang Z, Liu W, Cui Q, Niu W, Li H, Zhao X, et al. Prevalence and detection of  
423 *Stenotrophomonas maltophilia* carrying metallo- $\beta$ -lactamase blaL1 in Beijing, China.  
424 *Front Microbiol*. 2014 Dec;5.
- 425 12. Struve C, Roe CC, Stegger M, Stahlhut SG, Hansen DS, Engelthaler DM, et al.  
426 Mapping the Evolution of Hypervirulent *Klebsiella pneumoniae*. Segre J, Relman DA,  
427 editors. *MBio*. 2015 Jul;6(4).
- 428 13. Prokesch BC, TeKippe M, Kim J, Raj P, TeKippe EM, Greenberg DE. Primary  
429 osteomyelitis caused by hypervirulent *Klebsiella pneumoniae*. *Lancet Infect Dis*. 2016  
430 Sep;16(9):e190–5.
- 431 14. Patel PK, Russo TA, Karchmer AW. Hypervirulent *Klebsiella pneumoniae*. *Open*  
432 *Forum Infect Dis*. 2014 Jun;1(1):ofu028–ofu028.
- 433 15. Wang Q, Li B, Tsang AKL, Yi Y, Woo PCY, Liu CH. Genotypic Analysis of  
434 *Klebsiella pneumoniae* Isolates in a Beijing Hospital Reveals High Genetic Diversity  
435 and Clonal Population Structure of Drug-Resistant Isolates. Manganelli R, editor.  
436 *PLoS One*. 2013 Feb;8(2):e57091.
- 437 16. Chuang Y, Fang C, Lai S, Chang S, Wang J. Genetic Determinants of Capsular  
438 Serotype K1 of *Klebsiella pneumoniae* Causing Primary Pyogenic Liver Abscess. *J*  
439 *Infect Dis*. 2006 Mar;193(5):645–54.
- 440 17. Fang C-T, Chuang Y-P, Shun C-T, Chang S-C, Wang J-T. A Novel Virulence Gene in  
441 *Klebsiella pneumoniae* Strains Causing Primary Liver Abscess and Septic Metastatic  
442 Complications. *J Exp Med*. 2004 Mar;199(5):697–705.
- 443 18. Yeh K, Chang F, Fung C, Lin J, Siu LK. Serotype K1 Capsule, Rather than magA Per  
444 Se, Is Really the Virulence Factor in *Klebsiella pneumoniae* Strains That Cause

- 445 Primary Pyogenic Liver Abscess. *J Infect Dis.* 2006 Aug;194(3):403–4.
- 446 19. Yu VL, Hansen DS, Ko WC, Sagnimeni A, Klugman KP, von Gottberg A, et al.  
447 Virulence Characteristics of *Klebsiella* and Clinical Manifestations of *K. pneumoniae*  
448 Bloodstream Infections. *Emerg Infect Dis.* 2007 Jul;13(7):986–93.
- 449 20. Yu W-L, Ko W-C, Cheng K-C, Lee H-C, Ke D-S, Lee C-C, et al. Association between  
450 *rmpA* and *magA* Genes and Clinical Syndromes Caused by *Klebsiella pneumoniae* in  
451 Taiwan. *Clin Infect Dis.* 2006 May;42(10):1351–8.
- 452 21. Russo TA, Olson R, MacDonald U, Metzger D, Maltese LM, Drake EJ, et al.  
453 Aerobactin Mediates Virulence and Accounts for Increased Siderophore Production  
454 under Iron-Limiting Conditions by Hypervirulent (Hypermucoviscous) *Klebsiella*  
455 *pneumoniae*. *Infect Immun.* 2014 Jun;82(6):2356–67.
- 456 22. Fox JG, Rohovsky MW. Meningitis caused by *Klebsiella* spp in two rhesus monkeys. *J*  
457 *Am Vet Med Assoc.* 1975 Oct;167(7):634–6.
- 458 23. Gonzalo A ME. *Klebsiella pneumoniae* infection in a New World nonhuman primate  
459 center. *Lab Primate Newsl.* 1991;30:13–20.
- 460 24. Pisharath HR, Cooper TK, Brice AK, Cianciolo RE, Pistorio AL, Wachtman LM, et al.  
461 Septicemia and peritonitis in a colony of common marmosets (*Callithrix jacchus*)  
462 secondary to *Klebsiella pneumoniae* infection. *Contemp Top Lab Anim Sci.* 2005  
463 Jan;44(1):35–7.
- 464 25. Kindlovits A, Kindlovits L. *Clínica e Terapêutica em Primatas Neotropicais.* 2nd ed.  
465 Rio de Janeiro: L.F. Livros; 2009. 535 p.
- 466 26. Chalmers DT, Murgatroyd LB, Wadsworth PF. A survey of the pathology of  
467 marmosets (*Callithrix jacchus*) derived from a marmoset breeding unit. *Lab Anim.*  
468 1983 Oct;17(4):270–9.
- 469 27. Richard C. [Epidemiology of *Klebsiella pneumoniae* infections in 2 colonies of

- 470 squirrel monkeys and lemurs]. Bull Soc Pathol Exot Filiales. 1989;82(4):458–64.
- 471 28. Soto E, LaMon V, Griffin M, Keirstead N, Beierschmitt A, Palmour R. Phenotypic and  
472 genotypic characterization of *Klebsiella pneumoniae* isolates recovered from  
473 nonhuman primates. J Wildl Dis. 2012 Jul;48(3):603–11.
- 474 29. Twenhafel NA, Whitehouse CA, Stevens EL, Hottel HE, Foster CD, Gamble S, et al.  
475 Multisystemic Abscesses in African Green Monkeys ( *Chlorocebus aethiops* ) with  
476 Invasive *Klebsiella pneumoniae* —Identification of the Hypermucoviscosity  
477 Phenotype. Vet Pathol. 2008 Mar;45(2):226–31.
- 478 30. Burke RL, Whitehouse CA, Taylor JK, Selby EB. Epidemiology of invasive *Klebsiella*  
479 *pneumoniae* with hypermucoviscosity phenotype in a research colony of nonhuman  
480 primates. Comp Med. 2009 Dec;59(6):589–97.
- 481 31. Guerra MFL, Teixeira RHF, Ribeiro VL, Cunha MPV, Oliveira MGX, Davies YM, et  
482 al. Suppurative peritonitis by *Klebsiella pneumoniae* in captive gold-handed tamarin ( *Saguinus midas midas* ). J Med Primatol. 2016 Feb;45(1):42–6.
- 483
- 484 32. Anzai EK, de Souza Júnior JC, Peruchi AR, Fonseca JM, Gumpl EK, Pignatari ACC,  
485 et al. First case report of non-human primates ( *Alouatta clamitans* ) with the  
486 hypervirulent *Klebsiella pneumoniae* serotype K1 strain ST 23: A possible emerging  
487 wildlife pathogen. J Med Primatol. 2017 Dec;46(6):337–42.
- 488 33. Wu F, Ying Y, Yin M, Jiang Y, Wu C, Qian C, et al. Molecular Characterization of a  
489 Multidrug-Resistant *Klebsiella pneumoniae* Strain R46 Isolated from a Rabbit. Int J  
490 Genomics. 2019 Aug;2019:1–12.
- 491 34. Osman KM, Hassan HM, Orabi A, Abdelhafez AST. Phenotypic, antimicrobial  
492 susceptibility profile and virulence factors of *Klebsiella pneumoniae* isolated from  
493 buffalo and cow mastitic milk. Pathog Glob Health. 2014 Jun;108(4):191–9.
- 494 35. Boszczowski I, Salomão MC, Moura ML, Freire MP, Guimarães T, Cury AP, et al.

- 495 Multidrug-resistant *Klebsiella pneumoniae*: genetic diversity, mechanisms of  
496 resistance to polymyxins and clinical outcomes in a tertiary teaching hospital in Brazil.  
497 *Rev Inst Med Trop Sao Paulo*. 2019;61.
- 498 36. Brasil Ministério da Saúde, Secretaria de Vigilância em Saúde, Doenças D de V das,  
499 Transmissíveis. Guia de vigilância de epizootias em primatas não humanos e  
500 entomologia aplicada à vigilância da febre amarela / Ministério da Saúde, Secretaria de  
501 Vigilância em Saúde, Departamento de Vigilância das Doenças Transmissíveis. 2nd  
502 ed. Ministério da Saúde, editor. Brasília; 2014. 100 p.
- 503 37. Hunter SB, Vauterin P, Lambert-Fair MA, Van Duyne MS, Kubota K, Graves L, et al.  
504 Establishment of a universal size standard strain for use with the PulseNet standardized  
505 pulsed-field gel electrophoresis protocols: converting the national databases to the new  
506 size standard. *J Clin Microbiol* [Internet]. 2005;43(3):1045–50. Available from:  
507 <http://www.ncbi.nlm.nih.gov/pubmed/15750058>
- 508 38. Gerlach GF, Clegg S, Allen BL. Identification and characterization of the genes  
509 encoding the type 3 and type 1 fimbrial adhesins of *Klebsiella pneumoniae*. *J*  
510 *Bacteriol*. 1989;171(3):1262–70.
- 511 39. Tacconelli E, Carrara E, Savoldi A, Harbarth S, Mendelson M, Monnet DL, et al.  
512 Discovery, research, and development of new antibiotics: the WHO priority list of  
513 antibiotic-resistant bacteria and tuberculosis. *Lancet Infect Dis*. 2018 Mar;18(3):318–  
514 27.
- 515 40. Cox BL, Schiffer H, Dagget G, Beierschmitt A, Sithole F, Lee E, et al. Resistance of  
516 *Klebsiella pneumoniae* to the innate immune system of African green monkeys. *Vet*  
517 *Microbiol*. 2015 Mar;176(1–2):134–42.
- 518 41. Ludlage E, Mansfield K. Clinical care and diseases of the common marmoset  
519 (*Callithrix jacchus*). *Comp Med*. 2003 Aug;53(4):369–82.

- 520 42. Antunes SG, de Groot NG, Brok H, Doxiadis G, Menezes AAL, Otting N, et al. The  
521 common marmoset: A new world primate species with limited Mhc class II variability.  
522 Proc Natl Acad Sci. 1998 Sep;95(20):11745–50.
- 523 43. Russo TA, Olson R, Fang C-T, Stoesser N, Miller M, MacDonald U, et al.  
524 Identification of Biomarkers for Differentiation of Hypervirulent *Klebsiella*  
525 pneumoniae from Classical *K. pneumoniae*. Diekema DJ, editor. J Clin Microbiol.  
526 2018 Jun;56(9).
- 527 44. Cubero M, Grau I, Tubau F, Pallarés R, Dominguez MA, Liñares J, et al.  
528 Hypervirulent *Klebsiella pneumoniae* clones causing bacteraemia in adults in a  
529 teaching hospital in Barcelona, Spain (2007–2013). Clin Microbiol Infect. 2016  
530 Feb;22(2):154–60.
- 531 45. Liu Y, Long D, Xiang T-X, Du F-L, Wei DD, Wan L-G, et al. Whole genome  
532 assembly and functional portrait of hypervirulent extensively drug-resistant NDM-1  
533 and KPC-2 co-producing *Klebsiella pneumoniae* of capsular serotype K2 and ST86. J  
534 Antimicrob Chemother. 2019 May;74(5):1233–40.
- 535 46. Decre D, Verdet C, Emirian A, Le Gourrierec T, Petit J-C, Offenstadt G, et al.  
536 Emerging Severe and Fatal Infections Due to *Klebsiella pneumoniae* in Two  
537 University Hospitals in France. J Clin Microbiol. 2011 Aug;49(8):3012–4.
- 538 47. BIALEK-DAVENET S, NICOLAS-CHANOINE M-H, DECRE D, BRISSE S.  
539 Microbiological and clinical characteristics of bacteraemia caused by the  
540 hypermucoviscosity phenotype of *Klebsiella pneumoniae* in Korea. Epidemiol Infect.  
541 2013 Jan;141(1):188–188.
- 542 48. Bialek-Davenet S, Criscuolo A, Ailloud F, Passet V, Nicolas-Chanoine M-H, Decre D,  
543 et al. Development of a multiplex PCR assay for identification of *Klebsiella*  
544 pneumoniae hypervirulent clones of capsular serotype K2. J Med Microbiol. 2014



- 545 Dec;63(Pt\_12):1608–14.
- 546 49. Lin J-C, Koh T, Lee N, Fung C-P, Chang F-Y, Tsai Y-K, et al. Genotypes and  
547 virulence in serotype K2 *Klebsiella pneumoniae* from liver abscess and non-infectious  
548 carriers in Hong Kong, Singapore and Taiwan. *Gut Pathog.* 2014;6(1):21.
- 549 50. Russo TA, Gill SR. Draft Genome Sequence of the Hypervirulent *Klebsiella*  
550 *pneumoniae* Strain hvKP1, Isolated in Buffalo, New York. *Genome Announc.* 2013  
551 Mar;1(2):e0006513.
- 552 51. Melot B, Brisse S, Breurec S, Passet V, Malpote E, Lamaury I, et al. Community-  
553 acquired meningitis caused by a CG86 hypervirulent *Klebsiella pneumoniae* strain:  
554 first case report in the Caribbean. *BMC Infect Dis.* 2016;16(1):736.
- 555 52. Harada S, Doi Y. Hypervirulent *Klebsiella pneumoniae* □: a Call for Consensus  
556 Definition and International Collaboration. Diekema DJ, editor. *J Clin Microbiol.* 2018  
557 Jun;56(9).

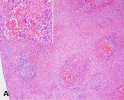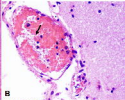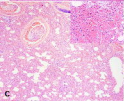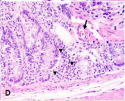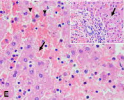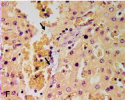

PFGE\_Xbal

PFGE\_Xbal

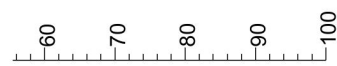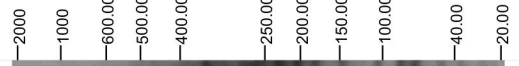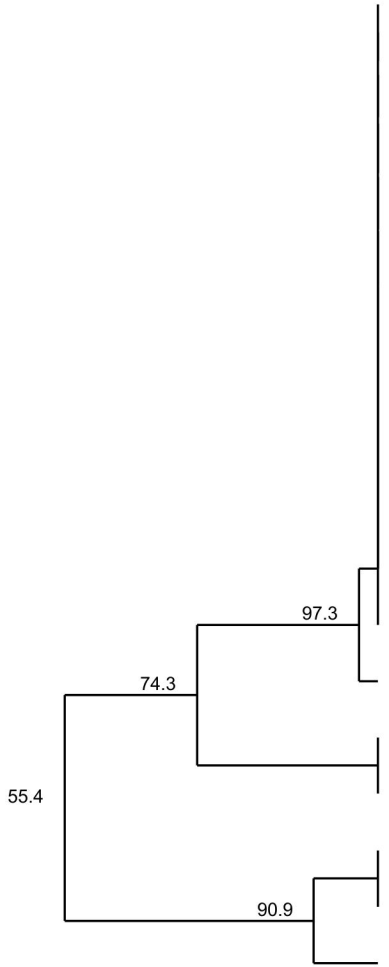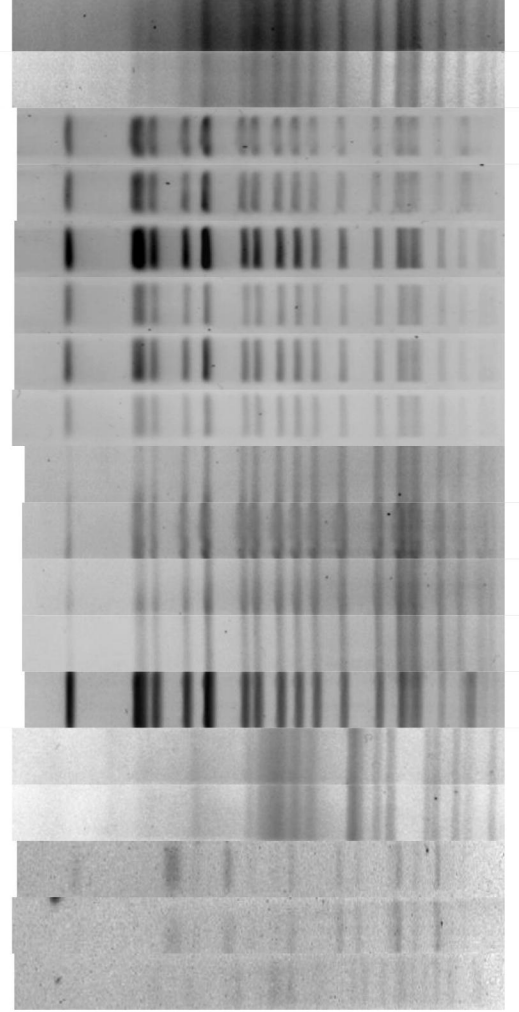

| Key   | Animal Number | Source      | Source_   | Outcome |
|-------|---------------|-------------|-----------|---------|
| P04   | 1             | Infection   | Liver     | Death   |
| P08   | 3             | Infection   | Liver     | Death   |
| P09   | 4             | Infection   | Brain     | Death   |
| P10   | 4             | Infection   | Liver     | Death   |
| P11   | 5             | Infection   | Brain     | Death   |
| P12   | 5             | Infection   | Liver     | Death   |
| P13   | 6             | Infection   | Brain     | Death   |
| P14   | 6             | Infection   | Liver     | Death   |
| P15   | 8             | Infection   | Blood     | Death   |
| P16   | 8             | Infection   | Liver     | Death   |
| P17   | 8             | Infection   | Intestine | Death   |
| P19   | 8             | Infection   | Brain     | Death   |
| P06   | 2             | Infection   | Liver     | Death   |
| B1    | NA            | Environment | Drag swab | NA      |
| C1    | NA            | Environment | Drag swab | NA      |
| RC5A1 | NA            | Environment | Water     | NA      |
| RC5B2 | NA            | Environment | Water     | NA      |
| RC5B1 | NA            | Environment | Water     | NA      |

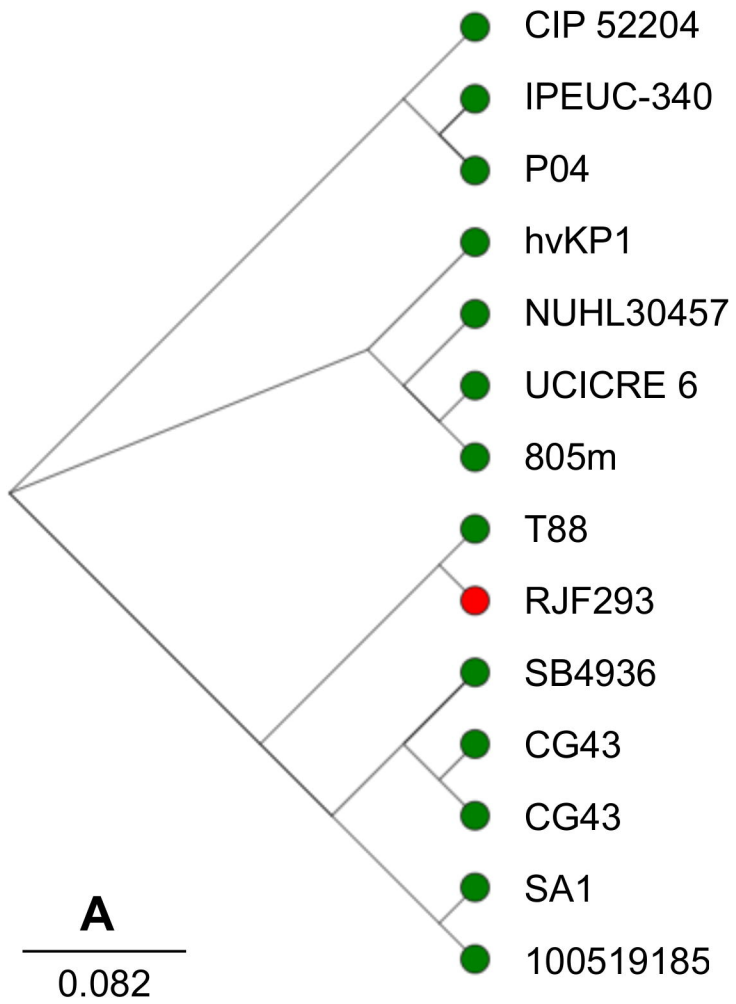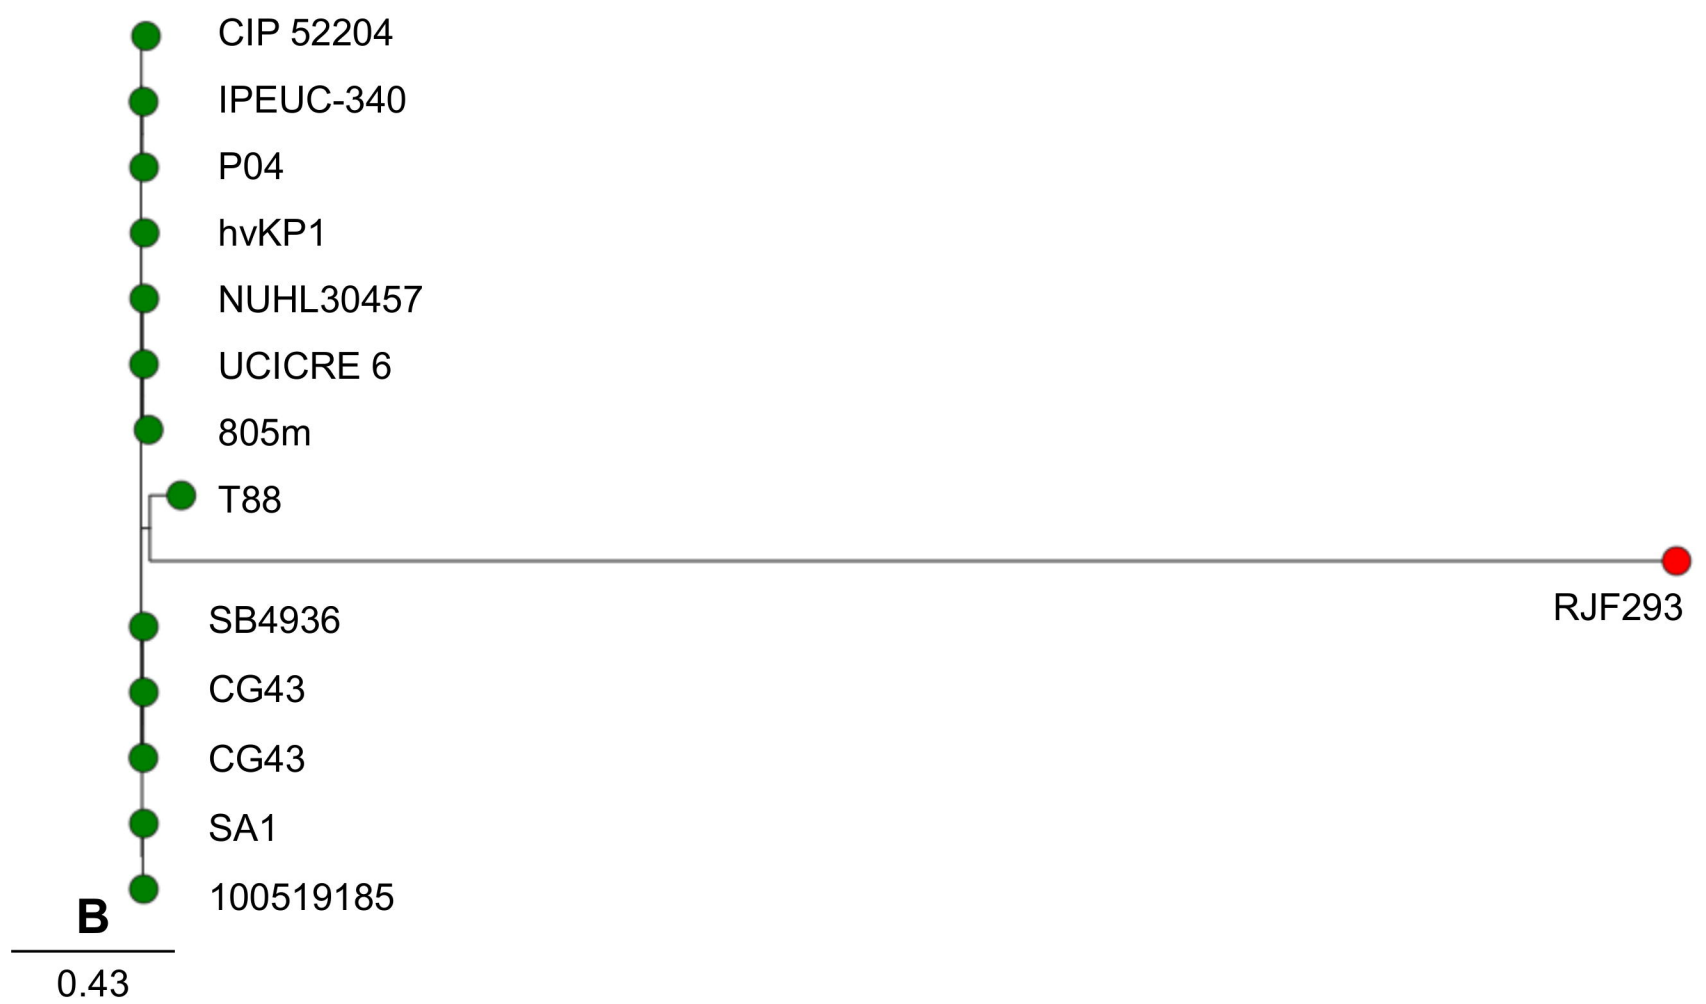

Source: https://biorxiv.org/content/biorxiv/early/2020/02/02/2020.02.02.930685.full-text.pdf
